# Supplementary material
Source: HighWire-hosted journal article supplement (https://bmjopen.bmj.com/content/14/8/e083221)
Supplement: inline-supplementary-material-2 [file inline-supplementary-material-2.pdf]

Supplementary materials

Table 1 Cross tabulation of the laboratory based ACR and the POC ACR.

| Laboratory based ACR |            |             |             |
|----------------------|------------|-------------|-------------|
| POC ACR              | Above 30   | Below 30    |             |
| Above 30             | 38 (74.5%) | 139         | 177         |
| Below 30             | 13         | 297 (68.1%) | 310 (63.6%) |
| Total                | 51         | 436 (89.5%) | 487         |

ACR Albumin Creatinine Ration, POC point of care.
